# Supplementary material for: Effects of Recurrent Selection on Population Structure and Allele Frequencies in the M3S Maize Population
Source: Preprints.org preprint supplement (doi:10.20944/preprints202311.1878.v1), 2023-11-29
Supplement: Supplementary file 1 [file Table S1.xlsx]

## Sheet: Table S4
Table S4. Selection protocols for the four selection cycles conducted in the M3S population
Starting cycle	Type of progeny		Number of progenies		Primary trait under selection	Selection intensity (%)	Resulting cycle
	Evaluated	Intermated	Evaluated	Intermated
C0	S1		750		Disease resistance1
	S2	S2	225	40	Grain yield	5	C1
C1	S1	S1	225	30	Grain yield	13	C2
C2	S1	S1	196	30	Grain yield	15	C3S1
	FS	FS	100	15	Grain yield	15	C3FS
C3FS	S1*	S1	196	30	Grain yield	15	C4N0
	S1**	S1	196	30	Grain yield	15	C4N150
1 resistance to Setosphaeria turcica (former Helminthosporium turcicum Pass) and Colletotrichum graminicola (Ces) GW Wils
*selection performed with 0 kg N ha-1 fertilization; **selection performed with 150 kg N ha-1 fertilization
