# Supplementary material for: Effects of Recurrent Selection on Population Structure and Allele Frequencies in the M3S Maize Population
Source: Preprints.org preprint supplement (doi:10.20944/preprints202311.1878.v1), 2023-11-29
Supplement: Supplementary file 2 [file Table S2.xlsx]

## Sheet: Table S2
Table S2. Allele frequencies (P), changes of allele frequencies (ΔP) at 38 SSR loci in seven cycle populations and results of Waples test of selective neutrality
in single cycles and across four cycles of selection in the M3S population.
1SCP ̶ Starting cycle population.
2RCP ̶ Resulting cycle population.
		Cycle population								SCP1	C0				SCP	C1				SCP	C2				SCP	C2				SCP	C3FS				SCP	C3FS				SCP	C0				SCP	C0
	Allele	C0	C1	C2	C3S1	C3FS	C4N0	C4N150		RCP2	C1	Waples test			RCP	C2				RCP	C3S1				RCP	C3FS				RCP	C4N0				RCP	C4N150				RCP	C4N0				RCP	C4N150
Locus	(size in bp)	Alele frequency (P)									ΔP	c2	Probability			ΔP	c2	Probability			ΔP	c2	Probability			ΔP	c2	Probability			ΔP	c2	Probability			ΔP	c2	Probability			ΔP	c2	Probability			ΔP	c2	Probability
bnlg128	170	0.78125	0.70313	0.75	0.5625	0.5625	0.70313	0.59375			0.07812	0.635589	0.425313			0.04687	0.232029	0.630024			-0.1875	3.27017	0.0705502			-0.1875	3.27017	0.0705502			-0.14063	1.78597	0.181418			-0.03125	0.0840184	0.771924			0.07812	0.281948	0.595427			0.1875	1.44657	0.229079
	184	0.01563	0.04688	0.09375	0.01563	0.07813	0.04688	0.07813			-0.03125	0.642744	0.422719			0.04687	0.705158	0.401056			-0.07812	2.47698	0.115524			-0.01562	0.0651737	0.798498			0.03125	0.349701	0.554283			0	0	1			-0.03125	0.285122	0.593364			-0.0625	0.77283	0.379343
	191	0.03125	0.21875	0.09375	0.3125	0.3125	0.23438	0.28125			-0.1875	6.40547	0.0113769			-0.125	2.48695	0.114794			0.21875	6.2033	0.0127512			0.21875	6.2033	0.0127512			0.07812	0.644571	0.42206			0.03125	0.0981689	0.754038			-0.20313	3.167	0.0751403			-0.25	4.19088	0.040642
	195	0.09375	0.01563	0.03125	0.10938	0.04688	0.01563	0.04688			0.07812	2.35239	0.125091			0.01562	0.223659	0.636266			0.07813	1.95944	0.161573			0.01563	0.136558	0.711727			0.03125	0.676786	0.410696			0	0	1			0.07812	1.04352	0.307004			0.04687	0.297074	0.585722
	199	0.07813	0.01563	0.03125	0	0	0	0			0.0625	1.74217	0.186864			0.01562	0.223659	0.636266			-0.03125	1.33229	0.248398			-0.03125	1.33229	0.248398			0	NA	NA			0	NA	NA			0.07813	1.43752	0.230542			0.07813	1.43752	0.230542
bnlg143	231	0.40625	0.45313	0.54688	0.39063	0.57813	0.53125	0.67188			-0.04688	0.178721	0.672475			0.09375	0.737705	0.390397			-0.15625	2.05721	0.151487			0.03125	0.0832685	0.772916			0.04688	0.186699	0.665678			-0.09375	0.786889	0.375042			-0.125	0.554675	0.456414			-0.26563	2.51034	0.113102
	237	0	0.04688	0.0625	0.26563	0.14063	0.21875	0.03125			-0.04688	1.91331	0.166596			0.01562	0.0990285	0.752999			0.20313	6.31306	0.0119852			0.07813	1.40373	0.236099			-0.07812	0.868766	0.351297			0.10938	3.19585	0.0738255			-0.21875	4.34252	0.0371718			-0.03125	0.561279	0.453746
	242	0.59375	0.5	0.39063	0.34375	0.28125	0.25	0.29688			0.09375	0.706811	0.400505			-0.10937	1.01616	0.313431			-0.04688	0.198468	0.65596			-0.10938	1.12535	0.28877			0.03125	0.105049	0.745852			-0.01563	0.0249444	0.874506			0.34375	4.28291	0.0384974			0.29687	3.15412	0.0757356
bnlg197	97	0.01563	0.01563	0.07813	0.07813	0.20313	0.09375	0.04688			0	0	1			0.0625	1.83445	0.175603			0	0	1			0.125	2.71295	0.0995367			0.10938	1.98605	0.158755			0.15625	4.68368	0.0304504			-0.07812	1.04352	0.307004			-0.03125	0.285122	0.593364
	99	0.48438	0.53125	0.53125	0.48438	0.3125	0.375	0.57813			-0.04687	0.175155	0.67557			0	0	1			-0.04687	0.184432	0.667592			-0.21875	4.1169	0.0424567			-0.0625	0.363352	0.54665			-0.26563	5.99405	0.0143542			0.10938	0.431587	0.511211			-0.09375	0.312005	0.576452
	107	0.14063	0.15625	0.17188	0.17188	0.03125	0.15625	0.09375			-0.01562	0.0384647	0.844513			0.01563	0.0373774	0.846699			0	0	1			-0.14063	4.54784	0.0329603			-0.125	3.85905	0.0494782			-0.0625	1.39891	0.236907			-0.01562	0.017063	0.896072			0.04688	0.187792	0.664761
	109	0.03125	0.01563	0.01563	0.0625	0.0625	0.01563	0.01563			0.01562	0.212409	0.644886			0	0	1			0.04687	1.22797	0.267802			0.04687	1.22797	0.267802			0.04687	1.22797	0.267802			0.04687	1.22797	0.267802			0.01562	0.0942246	0.758874			0.01562	0.0942246	0.758874
	111	0.03125	0.09375	0	0	0	0.07813	0.07813			-0.0625	1.32854	0.249065			-0.09375	4.12792	0.0421811			0	NA	NA			0	NA	NA			-0.07813	3.4122	0.0647163			-0.07813	3.4122	0.0647163			-0.04688	0.375796	0.539862			-0.04688	0.375796	0.539862
	113	0.14063	0.07813	0.07813	0.04688	0.375	0.03125	0.04688			0.0625	0.799092	0.371365			0	0	1			-0.03125	0.349701	0.554283			0.29687	10.5535	0.00115969			0.34375	15.3183	9.08299e-05			0.32812	13.573	0.00022946			0.10938	1.34637	0.245914			0.09375	0.914453	0.338936
	115	0.15625	0.10938	0.125	0.15625	0.01563	0.25	0.14063			0.04687	0.3801	0.53755			0.01562	0.0494862	0.82396			0.03125	0.169564	0.680499			-0.10937	3.83966	0.0500537			-0.23437	10.0075	0.00155905			-0.125	4.55211	0.0328782			-0.09375	0.480007	0.488419			0.01562	0.017063	0.896072
dupssr12	114	0.0625	0.01563	0.07813	0.07813	0.09375	0.10938	0.125			0.04687	1.16621	0.280182			0.0625	1.83445	0.175603			0	0	1			0.01562	0.0651737	0.798498			-0.01563	0.0561781	0.812642			-0.03125	0.210362	0.646484			-0.04688	0.247323	0.618967			-0.0625	0.406443	0.52378
	117	0	0.10938	0.10938	0.04688	0.04688	0.10938	0.125			-0.10938	4.61169	0.0317546			0	0	1			-0.0625	1.13803	0.28607			-0.0625	1.13803	0.28607			-0.0625	1.13803	0.28607			-0.07812	1.63018	0.201679			-0.10938	2.04575	0.152632			-0.125	2.35737	0.124692
	120	0.125	0.29688	0.01563	0	0	0.03125	0.01563			-0.17188	3.53711	0.0600099			-0.28125	12.5898	0.00038785			-0.01563	0.661114	0.416167			-0.01563	0.661114	0.416167			-0.03125	1.33229	0.248398			-0.01563	0.661114	0.416167			0.09375	1.0788	0.298967			0.10937	1.6176	0.203427
	126	0.1875	0.01563	0.09375	0.07813	0.0625	0.01563	0.07813			0.17187	6.45114	0.0110881			0.07812	2.47698	0.115524			-0.01562	0.0651737	0.798498			-0.03125	0.284523	0.593752			0.04687	1.22797	0.267802			-0.01563	0.0784177	0.779453			0.17187	2.86173	0.09071			0.10937	0.918114	0.337971
	131	0.34375	0.20313	0.23438	0.21875	0.26563	0.4375	0.32813			0.14062	1.98348	0.159024			0.03125	0.119904	0.729138			-0.01563	0.0292537	0.864194			0.03125	0.109288	0.740956			-0.17187	2.71899	0.0991605			-0.0625	0.392672	0.530898			-0.09375	0.326405	0.567784			0.01562	0.00966834	0.921672
	135	0.125	0.10938	0.14063	0.29688	0.15625	0.17188	0.1875			0.01562	0.0469971	0.828373			0.03125	0.187347	0.665134			0.15625	2.99761	0.0833875			0.01562	0.040502	0.840502			-0.01563	0.0373774	0.846699			-0.03125	0.14397	0.704366			-0.04688	0.153698	0.695026			-0.0625	0.26193	0.608797
	139	0.15625	0.25	0.32813	0.28125	0.375	0.125	0.14063			-0.09375	1.08207	0.298235			0.07813	0.62329	0.429827			-0.04688	0.21768	0.640813			0.04687	0.202208	0.652945			0.25	6.99454	0.00817589			0.23437	6.02371	0.014115			0.03125	0.0714355	0.789258			0.01562	0.017063	0.896072
nc130	137	0.21875	0.28125	0.34375	0.21875	0.34375	0.51563	0.35938			-0.0625	0.41517	0.519357			0.0625	0.38152	0.536791			-0.125	1.62192	0.202824			0	0	1			-0.17188	2.52967	0.111723			-0.01563	0.0224867	0.8808			-0.29688	3.35318	0.0670754			-0.14063	0.850726	0.356347
	140	0.78125	0.71875	0.65625	0.78125	0.65625	0.48438	0.64063			0.0625	0.41517	0.519357			-0.0625	0.38152	0.536791			0.125	1.62192	0.202824			0	0	1			0.17187	2.52939	0.111744			0.01562	0.0224581	0.880875			0.29687	3.35297	0.0670838			0.14062	0.850613	0.356379
phi015	89	0.48438	0.53125	0.59375	0.625	0.40625	0.32813	0.39063			-0.04687	0.175155	0.67557			0.0625	0.333073	0.563855			0.03125	0.0860866	0.769212			-0.1875	2.95082	0.085834			0.07812	0.551113	0.457863			0.01562	0.02136	0.883803			0.15625	0.894747	0.344194			0.09375	0.315718	0.574192
	100	0.25	0.40625	0.21875	0.26563	0.48438	0.60938	0.5625			-0.15625	2.20688	0.137396			-0.1875	3.43368	0.0638796			0.04688	0.251269	0.616183			0.26563	6.49475	0.0108194			-0.125	1.32311	0.250035			-0.07812	0.513358	0.473689			-0.35938	4.65908	0.0308897			-0.3125	3.579	0.0585143
	101	0.14063	0.03125	0.04688	0.04688	0.04688	0.04688	0.04688			0.10938	3.0351	0.0814817			0.01563	0.136558	0.711727			0	0	1			0	0	1			0	0	1			0	0	1			0.09375	0.914453	0.338936			0.09375	0.914453	0.338936
	105	0.125	0.03125	0.14063	0.0625	0.0625	0.01563	0			0.09375	2.43191	0.118888			0.10938	3.19585	0.0738255			-0.07813	1.40373	0.236099			-0.07813	1.40373	0.236099			0.04687	1.22797	0.267802			0.0625	2.70756	0.0998735			0.10937	1.6176	0.203427			0.125	2.35737	0.124692
phi033	234	0.14063	0.03125	0.04688	0.10938	0.03125	0.03125	0.04688			0.10938	3.0351	0.0814817			0.01563	0.136558	0.711727			0.0625	1.13803	0.28607			-0.01563	0.136558	0.711727			0	0	1			-0.01563	0.136558	0.711727			0.10938	1.34637	0.245914			0.09375	0.914453	0.338936
	247	0.25	0.39063	0.15625	0.14063	0.03125	0.125	0.04688			-0.14063	1.81025	0.178479			-0.23438	5.80213	0.0160067			-0.01562	0.040502	0.840502			-0.125	3.85905	0.0494782			-0.09375	2.56071	0.109549			-0.01563	0.136558	0.711727			0.125	0.906681	0.340997			0.20312	2.88535	0.0893887
	250	0.39063	0.53125	0.5	0.57813	0.78125	0.76563	0.79688			-0.14062	1.58591	0.207911			-0.03125	0.0820473	0.774542			0.07813	0.515507	0.472764			0.28125	7.20964	0.00725131			0.01562	0.0292168	0.864279			-0.01563	0.030799	0.86069			-0.375	5.09703	0.0239668			-0.40625	6.04854	0.0139178
	256	0.21875	0.04688	0.29688	0.17188	0.15625	0.07813	0.10938			0.17187	5.11103	0.0237743			0.25	9.21386	0.0024019			-0.125	1.82712	0.176468			-0.14063	2.36821	0.123829			0.07812	1.23779	0.265897			0.04687	0.400231	0.52697			0.14062	1.38289	0.23961			0.10937	0.771022	0.379901
phi034	121	0.39063	0.4375	0.4375	0.28125	0.45313	0.35938	0.4375			-0.04687	0.180442	0.670993			0	0	1			-0.15625	2.2252	0.135775			0.01563	0.0207532	0.885453			0.09375	0.764582	0.381898			0.01563	0.0207532	0.885453			0.03125	0.0368337	0.847804			-0.04687	0.0800444	0.777237
	139	0.60938	0.5625	0.5625	0.71875	0.54688	0.64063	0.5625			0.04688	0.18052	0.670927			0	0	1			0.15625	2.2252	0.135775			-0.01562	0.0207267	0.885526			-0.09375	0.764588	0.381897			-0.01562	0.0207267	0.885526			-0.03125	0.0368341	0.847803			0.04688	0.0800788	0.777191
phi036	67	0.46875	0.3125	0.35938	0.32813	0.3125	0.46875	0.4375			0.15625	2.04391	0.152816			0.04688	0.206722	0.649349			-0.03125	0.0908375	0.763115			-0.04688	0.206722	0.649349			-0.15625	2.15216	0.142369			-0.125	1.39891	0.236907			0	0	1			0.03125	0.034838	0.851936
	69	0.10938	0.01563	0.09375	0.14063	0.10938	0.07813	0.17188			0.09375	2.989	0.083832			0.07812	2.47698	0.115524			0.04688	0.445756	0.504357			0.01563	0.0561781	0.812642			0.03125	0.241179	0.623356			-0.0625	0.678238	0.410194			0.03125	0.101606	0.749911			-0.0625	0.285733	0.592968
	72	0	0	0.03125	0.01563	0	0.01563	0.01563			0	NA	NA			0.03125	1.33229	0.248398			-0.01562	0.223659	0.636266			-0.03125	1.33229	0.248398			-0.01563	0.661114	0.416167			-0.01563	0.661114	0.416167			-0.01563	0.278519	0.597673			-0.01563	0.278519	0.597673
	74	0.03125	0.04688	0.09375	0.09375	0.14063	0.0625	0.03125			-0.01563	0.129689	0.718755			0.04687	0.705158	0.401056			0	0	1			0.04688	0.445756	0.504357			0.07813	1.40373	0.236099			0.10938	3.19585	0.0738255			-0.03125	0.193227	0.660244			0	0	1
	76	0.32813	0.5625	0.21875	0.26563	0.35938	0.32813	0.28125			-0.23437	4.43157	0.0352801			-0.34375	10.4165	0.00124896			0.04688	0.251269	0.616183			0.14063	2.01935	0.155306			0.03125	0.0908375	0.763115			0.07813	0.588343	0.44306			0	0	1			0.04688	0.091706	0.762019
	79	0.0625	0.0625	0.20313	0.15625	0.07813	0.04688	0.0625			0	0	1			0.14063	3.60311	0.0576717			-0.04688	0.312862	0.575929			-0.125	2.71295	0.0995367			0.03125	0.349701	0.554283			0.01563	0.0784177	0.779453			0.01562	0.0417195	0.838155			0	0	1
phi050	80	0.01563	0	0.0625	0	0.03125	0.03125	0			0.01563	0.627861	0.428141			0.0625	2.70756	0.0998735			-0.0625	2.70756	0.0998735			-0.03125	0.458658	0.498252			0	0	1			0.03125	1.33229	0.248398			-0.01562	0.0942246	0.758874			0.01563	0.278519	0.597673
	83	0.125	0.15625	0.04688	0.34375	0	0	0			-0.03125	0.161036	0.688205			-0.10937	2.75072	0.0972109			0.29687	11.7666	0.000603028			-0.04688	2.01465	0.155788			0	NA	NA			0	NA	NA			0.125	2.35737	0.124692			0.125	2.35737	0.124692
	87	0.76563	0.70313	0.73438	0.53125	0.96875	0.8125	0.71875			0.0625	0.399066	0.527572			0.03125	0.101371	0.75019			-0.20313	3.7262	0.053565			0.23437	9.11864	0.00253018			0.15625	5.25905	0.0218329			0.25	9.94778	0.00161043			-0.04687	0.116678	0.732666			0.04688	0.101536	0.749994
	89	0.09375	0.14063	0.15625	0.125	0	0.15625	0.28125			-0.04688	0.423335	0.515278			0.01562	0.040502	0.840502			-0.03125	0.169564	0.680499			-0.15625	7.11309	0.00765232			-0.15625	7.11309	0.00765232			-0.28125	13.7347	0.000210526			-0.0625	0.315719	0.574192			-0.1875	2.04003	0.153206
phi053	167	0.32813	0.39063	0.26563	0.35938	0.39063	0.34375	0.42188			-0.0625	0.338121	0.560916			-0.125	1.4872	0.222652			0.09375	0.858413	0.354183			0.125	1.4872	0.222652			0.04688	0.198468	0.65596			-0.03125	0.0849535	0.770693			-0.01562	0.00966834	0.921672			-0.09375	0.331503	0.564775
	174	0.14063	0.23438	0.17188	0.15625	0.23438	0.23438	0.26563			-0.09375	1.14968	0.283617			-0.0625	0.506382	0.476709			-0.01563	0.0373774	0.846699			0.0625	0.506382	0.476709			0	0	1			-0.03125	0.109288	0.740956			-0.09375	0.509997	0.47514			-0.125	0.853331	0.355612
	192	0.53125	0.375	0.5625	0.48438	0.375	0.42188	0.3125			0.15625	1.96336	0.161154			0.1875	2.96239	0.0852218			-0.07812	0.513358	0.473689			-0.1875	2.96239	0.0852218			-0.04688	0.192404	0.660924			0.0625	0.363352	0.54665			0.10937	0.423907	0.514994			0.21875	1.7344	0.18785
phi056	247	0.1875	0.26563	0.17188	0.28125	0.46875	0.32813	0.39063			-0.07813	0.694202	0.404739			-0.09375	1.07914	0.29889			0.10937	1.43239	0.231376			0.29687	8.4943	0.0035626			0.14062	1.73114	0.188265			0.07812	0.522563	0.469751			-0.14063	0.913681	0.33914			-0.20313	1.77493	0.182773
	249	0.65625	0.5	0.70313	0.53125	0.51563	0.60938	0.54688			0.15625	1.99481	0.157839			0.20313	3.61234	0.0573525			-0.17188	2.62379	0.105273			-0.1875	3.09913	0.0783341			-0.09375	0.749416	0.386661			-0.03125	0.0822888	0.774219			0.04687	0.0835771	0.772507			0.10937	0.44118	0.506554
	256	0.15625	0.23438	0.125	0.1875	0.01563	0.0625	0.0625			-0.07813	0.774	0.378982			-0.10938	1.70315	0.191876			0.0625	0.621736	0.430403			-0.10937	3.83966	0.0500537			-0.04687	1.22797	0.267802			-0.04687	1.22797	0.267802			0.09375	0.797606	0.37181			0.09375	0.797606	0.37181
phi059	144	0.375	0.28125	0.40625	0.29688	0.375	0.28125	0.1875			0.09375	0.794477	0.37275			0.125	1.45341	0.227982			-0.10937	1.10104	0.294037			-0.03125	0.0860866	0.769212			0.09375	0.836556	0.360384			0.1875	3.64932	0.056092			0.09375	0.352431	0.55274			0.1875	1.53742	0.215003
	153	0.625	0.71875	0.59375	0.70313	0.625	0.71875	0.8125			-0.09375	0.794477	0.37275			-0.125	1.45341	0.227982			0.10938	1.10125	0.293992			0.03125	0.0860866	0.769212			-0.09375	0.836556	0.360384			-0.1875	3.64932	0.056092			-0.09375	0.352431	0.55274			-0.1875	1.53742	0.215003
phi064	74	0.10938	0.14063	0.04688	0.0625	0.01563	0.03125	0.03125			-0.03125	0.177924	0.673164			-0.09375	2.17061	0.14067			0.01562	0.0990285	0.752999			-0.03125	0.676786	0.410696			-0.01562	0.223659	0.636266			-0.01562	0.223659	0.636266			0.07813	0.825488	0.36358			0.07813	0.825488	0.36358
	80	0.375	0.42188	0.42188	0.57813	0.39063	0.40625	0.45313			-0.04688	0.182726	0.669041			0	0	1			0.15625	2.04918	0.152288			-0.03125	0.0849535	0.770693			-0.01562	0.02136	0.883803			-0.0625	0.336073	0.562105			-0.03125	0.0362672	0.848965			-0.07813	0.222421	0.637201
	86	0.15625	0.01563	0.15625	0.125	0.20313	0.20313	0.1875			0.14062	5.01639	0.0251085			0.14062	5.28207	0.0215461			-0.03125	0.169564	0.680499			0.04688	0.312862	0.575929			0	0	1			0.01563	0.0326164	0.856681			-0.04688	0.131805	0.716568			-0.03125	0.0606527	0.805467
	97	0.35938	0.42188	0.375	0.23438	0.39063	0.35938	0.32813			-0.0625	0.327024	0.567416			-0.04688	0.192404	0.660924			-0.14062	1.95856	0.161667			0.01563	0.0216967	0.882897			0.03125	0.0874312	0.767469			0.0625	0.356029	0.55072			0	0	1			0.03125	0.0382687	0.844905
phi076	159	0.23438	0.0625	0.1875	0.01563	0.5625	0.375	0.4375			0.17188	4.65748	0.0309185			0.125	2.99766	0.083385			-0.17187	6.79281	0.00915257			0.375	12.5902	0.000387782			0.1875	2.96239	0.0852218			0.125	1.31148	0.252128			-0.14062	0.825119	0.363688			-0.20312	1.63492	0.201024
	164	0.07813	0.21875	0.10938	0.07813	0	0	0			-0.14062	3.11742	0.0774595			-0.10937	1.83016	0.176109			-0.03125	0.241179	0.623356			-0.10938	4.85595	0.027551			0	NA	NA			0	NA	NA			0.07813	1.43752	0.230542			0.07813	1.43752	0.230542
	169	0.6875	0.71875	0.70313	0.90625	0.4375	0.625	0.5625			-0.03125	0.0932311	0.760109			-0.01562	0.0249127	0.874585			0.20312	5.50849	0.0189244			-0.26563	6.04184	0.0139707			-0.1875	2.96239	0.0852218			-0.125	1.31148	0.252128			0.0625	0.153076	0.695613			0.125	0.589342	0.442673
phi082	116	0.32813	0.32813	0.39063	0.42188	0.4375	0.3125	0.3125			0	0	1			0.0625	0.356029	0.55072			0.03125	0.0849535	0.770693			0.04687	0.189999	0.662917			0.125	1.39891	0.236907			0.125	1.39891	0.236907			0.01563	0.00991955	0.920664			0.01563	0.00991955	0.920664
	120	0.17188	0.34375	0.28125	0.29688	0.1875	0.28125	0.28125			-0.17187	3.07643	0.0794348			-0.0625	0.38152	0.536791			0.01563	0.0249444	0.874506			-0.09375	1.02777	0.310683			-0.09375	1.02777	0.310683			-0.09375	1.02777	0.310683			-0.10937	0.603447	0.437266			-0.10937	0.603447	0.437266
	124	0.46875	0.25	0.1875	0.125	0.23438	0.375	0.28125			0.21875	4.14201	0.0418315			-0.0625	0.479625	0.488592			-0.0625	0.621736	0.430403			0.04688	0.277068	0.598629			-0.14062	1.95856	0.161667			-0.04687	0.240907	0.623552			0.09375	0.318564	0.572472			0.1875	1.32602	0.249514
	130	0.03125	0.07813	0.14063	0.15625	0.14063	0.03125	0.125			-0.04688	0.847149	0.35736			0.0625	0.841414	0.358993			0.01562	0.040502	0.840502			0	0	1			0.10938	3.19585	0.0738255			0.01563	0.0445081	0.832911			0	0	1			-0.09375	1.0788	0.298967
phi083	126	0.875	0.73438	0.73438	0.82813	0.76563	0.71875	0.6875			0.14062	2.50731	0.113319			0	0	1			0.09375	1.07917	0.298882			0.03125	0.109291	0.740953			0.04688	0.241013	0.623475			0.07813	0.644744	0.421998			0.15625	1.33335	0.248209			0.1875	1.81854	0.177487
	130	0.125	0.26563	0.26563	0.17188	0.23438	0.28125	0.3125			-0.14063	2.50762	0.113297			0	0	1			-0.09375	1.07914	0.29889			-0.03125	0.109288	0.740956			-0.04687	0.240907	0.623552			-0.07812	0.644571	0.42206			-0.15625	1.33335	0.248209			-0.1875	1.81854	0.177487
phi084	153	0.53125	0.39063	0.46875	0.53125	0.64063	0.53125	0.375			0.14062	1.58591	0.207911			0.07812	0.522563	0.469751			0.0625	0.327869	0.566917			0.17188	2.50968	0.113149			0.10938	1.03476	0.309043			0.26563	5.9238	0.0149377			0	0	1			0.15625	0.870949	0.350693
	156	0.46875	0.60938	0.53125	0.46875	0.35938	0.46875	0.625			-0.14063	1.58614	0.207878			-0.07813	0.522698	0.469693			-0.0625	0.327869	0.566917			-0.17187	2.50938	0.11317			-0.10937	1.03457	0.309088			-0.26562	5.92335	0.0149415			0	0	1			-0.15625	0.870949	0.350693
phi098	131	0.70313	0.5625	1	0.84375	0.8125	0.8125	0.89063			0.14063	1.69614	0.192794			0.4375	23.5016	1.24807e-06			-0.15625	7.11309	0.00765232			-0.1875	8.68287	0.00321214			0	0	1			-0.07813	1.01336	0.3141			-0.10937	0.576163	0.44782			-0.1875	1.92007	0.165849
	133	0.29688	0.4375	0	0.15625	0.1875	0.1875	0.10938			-0.14062	1.69589	0.192827			-0.4375	23.5016	1.24807e-06			0.15625	7.11309	0.00765232			0.1875	8.68287	0.00321214			0	0	1			0.07812	1.01307	0.314169			0.10938	0.57626	0.447782			0.1875	1.91999	0.165857
phi109188	159	0	0.03125	0.07813	0.01563	0.07813	0.09375	0.0625			-0.03125	1.26528	0.260654			0.04688	0.892017	0.344931			-0.0625	1.83445	0.175603			0	0	1			-0.01562	0.0651737	0.798498			0.01563	0.0784177	0.779453			-0.09375	1.73904	0.18726			-0.0625	1.14066	0.285512
	163	1	0.78125	0.78125	0.85938	0.92188	0.76563	0.78125			0.21875	9.78926	0.00175534			0	0	1			0.07813	0.869007	0.35123			0.14063	3.28308	0.0699973			0.15625	3.88595	0.0486916			0.14063	3.28308	0.0699973			0.23437	4.69376	0.0302723			0.21875	4.34252	0.0371718
	169	0	0.1875	0.14063	0.125	0	0.14063	0.15625			-0.1875	8.24613	0.0040839			-0.04687	0.33611	0.562083			-0.01563	0.0445081	0.832911			-0.14063	6.34822	0.0117499			-0.14063	6.34822	0.0117499			-0.15625	7.11309	0.00765232			-0.14063	2.67443	0.101972			-0.15625	2.99666	0.0834365
phi115	293	0.28125	0.3125	0.1875	0.15625	0.10938	0.23438	0.0625			-0.03125	0.0932311	0.760109			-0.125	1.74863	0.186049			-0.03125	0.14397	0.704366			-0.07812	1.01307	0.314169			-0.125	2.30346	0.129086			0.04688	0.587064	0.443557			0.04687	0.101491	0.750047			0.21875	2.97198	0.0847179
	305	0.71875	0.6875	0.8125	0.84375	0.89063	0.76563	0.9375			0.03125	0.0932311	0.760109			0.125	1.74863	0.186049			0.03125	0.14397	0.704366			0.07813	1.01336	0.3141			0.125	2.30357	0.129077			-0.04687	0.586844	0.443642			-0.04688	0.101536	0.749994			-0.21875	2.97198	0.0847179
phi116	158	0.25	0.07813	0.09375	0.17188	0.07813	0.09375	0.09375			0.17187	4.29219	0.0382879			0.01562	0.0651737	0.798498			0.07813	1.11213	0.291619			-0.01562	0.0651737	0.798498			-0.01562	0.0651737	0.798498			-0.01562	0.0651737	0.798498			0.15625	1.51632	0.218177			0.15625	1.51632	0.218177
	164	0.4375	0.71875	0.79688	0.64063	0.625	0.53125	0.59375			-0.28125	6.46318	0.0110132			0.07813	0.69792	0.403484			-0.15625	2.53428	0.111398			-0.17188	3.01655	0.0824189			0.09375	0.756166	0.384531			0.03125	0.0860866	0.769212			-0.09375	0.31109	0.577012			-0.15625	0.864139	0.352583
	168	0.09375	0.07813	0.09375	0.10938	0.125	0.15625	0.20313			0.01562	0.0618955	0.803525			0.01562	0.0651737	0.798498			0.01563	0.0561781	0.812642			0.03125	0.210362	0.646484			-0.03125	0.169564	0.680499			-0.07813	0.933958	0.333837			-0.0625	0.315719	0.574192			-0.10938	0.836698	0.360343
	170	0.21875	0.125	0.01563	0.07813	0.17188	0.21875	0.10938			0.09375	1.23055	0.267299			-0.10937	3.83966	0.0500537			0.0625	1.83445	0.175603			0.15625	6.02948	0.0140688			-0.04687	0.293298	0.588115			0.0625	0.678238	0.410194			0	0	1			0.10937	0.771022	0.379901
phi123	145	0.28125	0.28125	0.39063	0.3125	0.34375	0.26563	0.15625			0	0	1			0.10938	1.12535	0.28877			-0.07813	0.56188	0.453504			-0.04688	0.198468	0.65596			0.07812	0.604461	0.436881			0.1875	3.93443	0.0473073			0.01562	0.0108564	0.917015			0.125	0.808241	0.368641
	149	0.71875	0.71875	0.60938	0.6875	0.65625	0.73438	0.84375			0	0	1			-0.10937	1.12515	0.288812			0.07812	0.56174	0.45356			0.04687	0.198385	0.656028			-0.07813	0.604621	0.43682			-0.1875	3.93443	0.0473073			-0.01563	0.0108705	0.916962			-0.125	0.808241	0.368641
phi126	136	0.57813	0.54688	0.5	0.65625	0.59375	0.42188	0.64063			0.03125	0.0790801	0.778548			-0.04688	0.184872	0.667219			0.15625	2.10046	0.147255			0.09375	0.744246	0.388304			0.17187	2.47997	0.115304			-0.04688	0.195188	0.658633			0.15625	0.863295	0.352818			-0.0625	0.14507	0.703292
	142	0.14063	0.20313	0.28125	0.125	0.20313	0.35938	0.20313			-0.0625	0.5469	0.459587			0.07812	0.697731	0.403547			-0.15625	3.16495	0.0752348			-0.07812	0.697731	0.403547			-0.15625	2.53422	0.111402			0	0	1			-0.21875	2.25605	0.133093			-0.0625	0.242605	0.622331
	164	0.0625	0.07813	0.01563	0.09375	0.04688	0.07813	0.10938			-0.01563	0.0744734	0.784932			-0.0625	1.83445	0.175603			0.07812	2.47698	0.115524			0.03125	0.676786	0.410696			-0.03125	0.349701	0.554283			-0.0625	1.13803	0.28607			-0.01563	0.0330364	0.855772			-0.04688	0.247323	0.618967
	176	0.20313	0.10938	0.14063	0.09375	0.03125	0.03125	0.03125			0.09375	1.32851	0.249071			0.03125	0.187347	0.665134			-0.04688	0.445756	0.504357			-0.10938	3.19585	0.0738255			0	0	1			0	0	1			0.17188	2.52436	0.1121			0.17188	2.52436	0.1121
	196	0.01563	0.0625	0.0625	0.03125	0.125	0.10938	0.01563			-0.04687	1.16621	0.280182			0	0	1			-0.03125	0.458658	0.498252			0.0625	0.964764	0.32599			0.01562	0.0494862	0.82396			0.10937	3.83966	0.0500537			-0.09375	1.32592	0.249532			0	0	1
phi128	100	0.07813	0.21875	0.04688	0.0625	0.10938	0.10938	0.10938			-0.14062	3.11742	0.0774595			-0.17187	5.38172	0.0203488			0.01562	0.0990285	0.752999			0.0625	1.13803	0.28607			0	0	1			0	0	1			-0.03125	0.101606	0.749911			-0.03125	0.101606	0.749911
	105	0.51563	0.375	0.67188	0.5	0.625	0.64063	0.625			0.14063	1.59554	0.206536			0.29688	7.41408	0.00647152			-0.17188	2.55514	0.109936			-0.04688	0.202295	0.652874			-0.01563	0.0220616	0.881923			0	0	1			-0.125	0.566337	0.451718			-0.10937	0.43151	0.511249
	110	0.40625	0.40625	0.28125	0.4375	0.26563	0.25	0.26563			0	0	1			-0.125	1.45341	0.227982			0.15625	2.2252	0.135775			-0.01562	0.0257697	0.872464			0.01563	0.0267903	0.869985			0	0	1			0.15625	0.978974	0.322452			0.14062	0.783581	0.376048
phi213984	286	0.10938	0.14063	0.09375	0.0625	0.0625	0.28125	0.20313			-0.03125	0.177924	0.673164			-0.04688	0.445756	0.504357			-0.03125	0.284523	0.593752			-0.03125	0.284523	0.593752			-0.21875	7.05452	0.00790654			-0.14063	3.60311	0.0576717			-0.17187	1.66149	0.197402			-0.09375	0.589327	0.442679
	304	0.89063	0.85938	0.90625	0.9375	0.9375	0.71875	0.79688			0.03125	0.177936	0.673153			0.04687	0.445583	0.50444			0.03125	0.284523	0.593752			0.03125	0.284523	0.593752			0.21875	7.05452	0.00790654			0.14062	3.60271	0.0576855			0.17188	1.66172	0.197372			0.09375	0.589358	0.442668
phi233376	137	0.15625	0.21875	0.15625	0.07813	0.3125	0.375	0.26563			-0.0625	0.510978	0.474716			-0.0625	0.538041	0.463246			-0.07812	1.23779	0.265897			0.15625	2.85491	0.0910952			-0.0625	0.363352	0.54665			0.04687	0.224308	0.635777			-0.21875	2.16854	0.14086			-0.10938	0.635427	0.425372
	140	0.20313	0.53125	0.26563	0.3125	0.42188	0.34375	0.51563			-0.32812	9.23354	0.00237622			-0.26562	6.17675	0.012944			0.04687	0.224308	0.635777			0.15625	2.27094	0.13182			0.07813	0.54214	0.461547			-0.09375	0.740597	0.38947			-0.14062	0.879872	0.348237			-0.3125	3.74977	0.0528148
	148	0.35938	0.21875	0.39063	0.46875	0.10938	0.23438	0.14063			0.14063	1.91777	0.166102			0.17188	2.92613	0.087156			0.07812	0.522563	0.469751			-0.28125	8.85234	0.00292713			-0.125	2.30346	0.129086			-0.03125	0.187347	0.665134			0.125	0.661711	0.415956			0.21875	2.25605	0.133093
	151	0.28125	0.03125	0.1875	0.14063	0.15625	0.04688	0.07813			0.25	9.44742	0.00211447			0.15625	5.25905	0.0218329			-0.04687	0.33611	0.562083			-0.03125	0.14397	0.704366			0.10937	2.75072	0.0972109			0.07812	1.23779	0.265897			0.23437	3.54058	0.0598845			0.20312	2.47436	0.115717
phi236654	123	0.42188	0.29688	0.45313	0.57813	0.35938	0.45313	0.42188			0.125	1.35249	0.244844			0.15625	2.18578	0.13929			0.125	1.31276	0.251896			-0.09375	0.764582	0.381898			-0.09375	0.764582	0.381898			-0.0625	0.344345	0.557332			-0.03125	0.0350798	0.851428			0	0	1
	127	0.57813	0.70313	0.54688	0.42188	0.64063	0.54688	0.57813			-0.125	1.3525	0.244841			-0.15625	2.1858	0.139288			-0.125	1.31276	0.251896			0.09375	0.764588	0.381897			0.09375	0.764588	0.381897			0.0625	0.344348	0.55733			0.03125	0.03508	0.851428			0	0	1
phi308090	208	0.1875	0.25	0.125	0.29688	0	0.0625	0.01563			-0.0625	0.4555	0.499734			-0.125	2.15216	0.142369			0.17188	3.72445	0.0536214			-0.125	5.59563	0.0180054			-0.0625	2.70756	0.0998735			-0.01563	0.661114	0.416167			0.125	1.26288	0.261107			0.17187	2.86173	0.09071
	216	0.1875	0.25	0.20313	0.20313	0.15625	0.04688	0.17188			-0.0625	0.4555	0.499734			-0.04687	0.263059	0.608026			0	0	1			-0.04688	0.312862	0.575929			0.10937	2.75072	0.0972109			-0.01563	0.0373774	0.846699			0.14062	1.68964	0.193648			0.01562	0.0146325	0.903719
	219	0.625	0.5	0.67188	0.5	0.84375	0.89063	0.8125			0.125	1.26528	0.260654			0.17188	2.55514	0.109936			-0.17188	2.55514	0.109936			0.17187	3.3773	0.0661002			-0.04688	0.400415	0.526875			0.03125	0.14397	0.704366			-0.26563	3.39862	0.0652509			-0.1875	1.53742	0.215003
phi339017	148	0.3125	0.45313	0.51563	0.4375	0.46875	0.39063	0.28125			-0.14063	1.66809	0.196515			0.0625	0.328189	0.566727			-0.07813	0.513489	0.473633			-0.04688	0.184511	0.667525			0.07812	0.522563	0.469751			0.1875	3.14754	0.0760415			-0.07813	0.236713	0.62659			0.03125	0.0413574	0.83885
	151	0.34375	0.32813	0.20313	0.25	0.10938	0.29688	0.21875			0.01562	0.0217952	0.882633			-0.125	1.68077	0.194822			0.04687	0.263059	0.608026			-0.09375	1.39887	0.236913			-0.1875	4.55744	0.032776			-0.10937	1.83016	0.176109			0.04687	0.0891998	0.765197			0.125	0.683296	0.408454
	154	0.10938	0.07813	0.14063	0.125	0.0625	0	0.10938			0.03125	0.229048	0.63223			0.0625	0.841414	0.358993			-0.01563	0.0445081	0.832911			-0.07813	1.40373	0.236099			0.0625	2.70756	0.0998735			-0.04688	0.587064	0.443557			0.10938	2.04575	0.152632			0	0	1
	157	0.23438	0.14063	0.14063	0.1875	0.35938	0.3125	0.39063			0.09375	1.14968	0.283617			0	0	1			0.04687	0.33611	0.562083			0.21875	5.35512	0.0206615			0.04688	0.206722	0.649349			-0.03125	0.0874312	0.767469			-0.07812	0.27155	0.602294			-0.15625	1.00455	0.316211
phi389203	301	0.15625	0.0625	0.03125	0	0.07813	0.125	0.03125			0.09375	1.79803	0.179951			-0.03125	0.458658	0.498252			-0.03125	1.33229	0.248398			0.04688	0.892017	0.344931			-0.04687	0.505172	0.477236			0.04688	0.892017	0.344931			0.03125	0.0714355	0.789258			0.125	1.62577	0.202289
	307	0.40625	0.40625	0.51563	0.57813	0.6875	0.76563	0.65625			0	0	1			0.10938	1.01036	0.314818			0.0625	0.330777	0.565202			0.17187	2.58607	0.107808			-0.07813	0.644744	0.421998			0.03125	0.0929506	0.760459			-0.35938	4.70598	0.0300578			-0.25	2.2187	0.136348
	310	0.39063	0.3125	0.29688	0.3125	0.125	0.0625	0.17188			0.07813	0.533618	0.46509			-0.01562	0.024166	0.876463			0.01562	0.024166	0.876463			-0.17188	3.72445	0.0536214			0.0625	0.964764	0.32599			-0.04688	0.364829	0.545837			0.32813	5.43168	0.0197746			0.21875	2.09257	0.148017
	313	0.04688	0.21875	0.15625	0.10938	0.10938	0.04688	0.14063			-0.17187	5.11103	0.0237743			-0.0625	0.538041	0.463246			-0.04687	0.400231	0.52697			-0.04687	0.400231	0.52697			0.0625	1.13803	0.28607			-0.03125	0.187347	0.665134			0	0	1			-0.09375	0.914453	0.338936
phi438301	208	0	0.01563	0.07813	0.04688	0.14063	0.21875	0.03125			-0.01563	0.627861	0.428141			0.0625	1.83445	0.175603			-0.03125	0.349701	0.554283			0.0625	0.841414	0.358993			-0.07812	0.868766	0.351297			0.10938	3.19585	0.0738255			-0.21875	4.34252	0.0371718			-0.03125	0.561279	0.453746
	211	1	0.98438	0.92188	0.95313	0.85938	0.78125	0.96875			0.01562	0.627456	0.42829			-0.0625	1.83482	0.175559			0.03125	0.349753	0.554253			-0.0625	0.841482	0.358973			0.07813	0.869007	0.35123			-0.10937	3.19543	0.0738443			0.21875	4.34252	0.0371718			0.03125	0.561279	0.453746
phi452693	123	0.04688	0.15625	0.03125	0.03125	0.04688	0.21875	0.07813			-0.10937	2.61236	0.106034			-0.125	3.85905	0.0494782			0	0	1			0.01563	0.136558	0.711727			-0.17187	5.38172	0.0203488			-0.03125	0.349701	0.554283			-0.17187	2.26725	0.132134			-0.03125	0.147325	0.701105
	131	0.57813	0.46875	0.54688	0.46875	0.5	0.46875	0.60938			0.10938	0.955781	0.328252			0.07813	0.512486	0.474065			-0.07813	0.512486	0.474065			-0.04688	0.184872	0.667219			0.03125	0.0820473	0.774542			-0.10938	1.01635	0.313386			0.10938	0.423985	0.514955			-0.03125	0.0357902	0.849949
	133	0.375	0.375	0.42188	0.5	0.45313	0.3125	0.3125			0	0	1			0.04688	0.192404	0.660924			0.07812	0.515375	0.472821			0.03125	0.0832681	0.772917			0.14063	1.75643	0.18507			0.14063	1.75643	0.18507			0.0625	0.153076	0.695613			0.0625	0.153076	0.695613
phi96100	276	0.5	0.60938	0.4375	0.40625	0.29688	0.34375	0.375			-0.10938	0.965228	0.325873			-0.17188	2.48511	0.114928			-0.03125	0.0840184	0.771924			-0.14062	1.78571	0.18145			-0.04687	0.211731	0.645414			-0.07812	0.574031	0.448661			0.15625	0.884899	0.346863			0.125	0.561279	0.453746
	280	0.03125	0.0625	0.03125	0	0.10938	0.10938	0			-0.03125	0.435588	0.50926			-0.03125	0.458658	0.498252			-0.03125	1.33229	0.248398			0.07813	1.95944	0.161573			0	0	1			0.10938	4.85595	0.027551			-0.07813	0.825488	0.36358			0.03125	0.561279	0.453746
	289	0.15625	0.09375	0.26563	0.48438	0.26563	0.20313	0.32813			0.0625	0.711719	0.398874			0.17188	4.20561	0.0402905			0.21875	4.28413	0.0384698			0	0	1			0.0625	0.456779	0.499133			-0.0625	0.392672	0.530898			-0.04688	0.131805	0.716568			-0.17188	1.42296	0.232917
	297	0.3125	0.23438	0.26563	0.10938	0.32813	0.34375	0.29688			0.07812	0.61215	0.433979			0.03125	0.109288	0.740956			-0.15625	3.36269	0.0666891			0.0625	0.392672	0.530898			-0.01562	0.0229495	0.879588			0.03125	0.0953792	0.757447			-0.03125	0.039159	0.843134			0.01562	0.0101809	0.91963
phi96342	240	0.42188	0.21875	0.32813	0.28125	0.4375	0.48438	0.625			0.20313	3.77685	0.0519663			0.10938	1.26364	0.260964			-0.04688	0.21768	0.640813			0.10937	1.06236	0.302677			-0.04688	0.185598	0.666606			-0.1875	2.96239	0.0852218			-0.0625	0.139352	0.708926			-0.20312	1.46211	0.226595
	248	0.57813	0.78125	0.67188	0.71875	0.5625	0.51563	0.375			-0.20312	3.77651	0.0519769			-0.10937	1.26342	0.261005			0.04687	0.217589	0.640883			-0.10938	1.06256	0.302632			0.04687	0.185519	0.666672			0.1875	2.96239	0.0852218			0.0625	0.139352	0.708926			0.20313	1.46225	0.226572
umc1033	117	0.07813	0.04688	0.25	0.35938	0.1875	0.1875	0.14063			0.03125	0.332111	0.564419			0.20312	6.84888	0.00886971			0.10938	1.185	0.27634			-0.0625	0.479625	0.488592			0	0	1			0.04687	0.33611	0.562083			-0.10937	0.918114	0.337971			-0.0625	0.354478	0.551589
	121	0.28125	0.14063	0.1875	0.125	0.15625	0.23438	0.375			0.14062	2.36751	0.123884			0.04687	0.33611	0.562083			-0.0625	0.621736	0.430403			-0.03125	0.14397	0.704366			-0.07813	0.814994	0.366648			-0.21875	5.14742	0.023281			0.04687	0.101491	0.750047			-0.09375	0.352431	0.55274
	128	0.10938	0.23438	0.28125	0.3125	0.1875	0.20313	0.26563			-0.125	2.1876	0.139126			0.04687	0.240907	0.623552			0.03125	0.0981689	0.754038			-0.09375	1.02777	0.310683			-0.01563	0.0326164	0.856681			-0.07813	0.730969	0.392569			-0.09375	0.589327	0.442679			-0.15625	1.41666	0.233954
	130	0.15625	0.10938	0.0625	0.09375	0.07813	0.04688	0.03125			0.04687	0.3801	0.53755			-0.04688	0.587064	0.443557			0.03125	0.284523	0.593752			0.01563	0.0784177	0.779453			0.03125	0.349701	0.554283			0.04688	0.892017	0.344931			0.10937	1.15884	0.281706			0.125	1.62577	0.202289
	132	0.03125	0.0625	0.03125	0	0.09375	0.0625	0.03125			-0.03125	0.435588	0.50926			-0.03125	0.458658	0.498252			-0.03125	1.33229	0.248398			0.0625	1.39891	0.236907			0.03125	0.284523	0.593752			0.0625	1.39891	0.236907			-0.03125	0.193227	0.660244			0	0	1
	150	0.26563	0.23438	0.10938	0.07813	0.28125	0.15625	0.10938			0.03125	0.103791	0.747327			-0.125	2.30346	0.129086			-0.03125	0.241179	0.623356			0.17187	3.94384	0.0470434			0.125	1.9185	0.166022			0.17187	3.94384	0.0470434			0.10938	0.635427	0.425372			0.15625	1.41666	0.233954
	153	0.07813	0.17188	0.07813	0.03125	0.01563	0.10938	0.04688			-0.09375	1.60131	0.205717			-0.09375	1.68612	0.194113			-0.04688	0.892017	0.344931			-0.0625	1.83445	0.175603			-0.09375	3.14731	0.0760524			-0.03125	0.676786	0.410696			-0.03125	0.101606	0.749911			0.03125	0.147325	0.701105
umc1359	209	0.15625	0.28125	0.1875	0.25	0.1875	0.14063	0			-0.125	1.822	0.177075			-0.09375	1.02777	0.310683			0.0625	0.479625	0.488592			0	0	1			0.04687	0.33611	0.562083			0.1875	8.68287	0.00321214			0.01562	0.017063	0.896072			0.15625	2.99666	0.0834365
	290	0.01563	0	0	0.04688	0	0.01563	0			0.01563	0.627861	0.428141			0	NA	NA			0.04688	2.01465	0.155788			0	NA	NA			-0.01563	0.661114	0.416167			0	NA	NA			0	0	1			0.01563	0.278519	0.597673
	297	0.10938	0.0625	0.10938	0.125	0.14063	0.125	0.1875			0.04688	0.557535	0.455255			0.04688	0.587064	0.443557			0.01562	0.0494862	0.82396			0.03125	0.187347	0.665134			0.01563	0.0445081	0.832911			-0.04687	0.33611	0.562083			-0.01562	0.0208479	0.885194			-0.07812	0.426793	0.513567
	306	0.59375	0.35938	0.46875	0.40625	0.57813	0.60938	0.70313			0.23437	4.3882	0.0361886			0.10937	1.03457	0.309088			-0.0625	0.333073	0.563855			0.10938	1.0064	0.315766			-0.03125	0.0849542	0.770693			-0.125	1.42413	0.232724			-0.01563	0.00901025	0.924377			-0.10938	0.463944	0.495786
	308	0.125	0.29688	0.23438	0.17188	0.09375	0.10938	0.10938			-0.17188	3.53711	0.0600099			-0.0625	0.420192	0.516841			-0.0625	0.506382	0.476709			-0.14063	3.02585	0.0819473			-0.01563	0.0561781	0.812642			-0.01563	0.0561781	0.812642			0.01562	0.0208479	0.885194			0.01562	0.0208479	0.885194
bnlg572	94	0.14063	0.35938	0.20313	0.375	0.40625	0.3125	0.32813			-0.21875	5.08576	0.0241231			-0.15625	2.53422	0.111402			0.17187	3.01616	0.0824383			0.20312	4.08647	0.0432277			0.09375	0.801071	0.370773			0.07812	0.551113	0.457863			-0.17187	1.49019	0.222187			-0.1875	1.73192	0.188166
	102	0.625	0.375	0.42188	0.375	0.46875	0.46875	0.5625			0.25	4.98204	0.0256118			0.04688	0.192404	0.660924			-0.04688	0.192404	0.660924			0.04687	0.186619	0.665745			0	0	1			-0.09375	0.738426	0.390166			0.15625	0.870949	0.350693			0.0625	0.14316	0.705159
	109	0.23438	0.26563	0.375	0.25	0.125	0.21875	0.10938			-0.03125	0.103791	0.747327			0.10937	1.1529	0.282943			-0.125	1.52608	0.216702			-0.25	6.99454	0.00817589			-0.09375	1.29573	0.254995			0.01562	0.0494862	0.82396			0.01563	0.0123242	0.911605			0.125	0.970422	0.324575
NA ̶ not available
