# Supplementary material for: Effects of Recurrent Selection on Population Structure and Allele Frequencies in the M3S Maize Population
Source: Preprints.org preprint supplement (doi:10.20944/preprints202311.1878.v1), 2023-11-29
Supplement: Supplementary file 3 [file Table S3.xlsx]

## Sheet: Table S3
Table S3. Observed heterozygosity (Ho), expected heterozygosity (He), fixation index (FIS), and the test of Hardy-Weinberg disequilibrium (H-W test) for 38 SSR loci in seven M3S cycle populations (C0, C1, C2, C3S1, C3FS, C4N0 and C4N150)
Locus	Bin	Ho	He	FIS	H-W test			Ho	He	FIS	H-W test			Ho	He	FIS	H-W test			Ho	He	FIS	H-W test			Ho	He	FIS	H-W test			Ho	He	FIS	H-W test			Ho	He	FIS	H-W test
					G2	P					G2	P					G2	P					G2	P					G2	P					G2	P					G2	P
		C0						C1						C2						C3S1						C3FS						C4N0						C4N150
bnlg128	9.07	0.3438	0.3735	0.0795181	11.8789	0.293243		0.4375	0.4623	0.0536448	1.86264	0.997289		0.3438	0.4246	0.190297	11.9202	0.29043		0.5625	0.5828	0.0348318	6.44724	0.374996		0.6875	0.5868	-0.171609	5.04396	0.538187		0.41	0.45	0.0888889	3.53	0.7397		0.5	0.56	0.107143	3.87	0.6943
bnlg143	5.01	0.4375	0.4824	0.0930763	0.379518	0.537861		0.2812	0.5511	0.489748	14.7872	0.002214		0.4375	0.5531	0.209004	4.17322	0.243356		0.6875	0.6691	-0.0274996	0.554672	0.906726		0.4688	0.5759	0.18597	8.21017	0.041862		0.47	0.61	0.229508	8.42	0.0381		0.34	0.46	0.26087	11.29	0.0103
bnlg197	3.07	0.6875	0.6992	0.0167334	22.4814	0.372236		0.5938	0.6766	0.122377	13.5165	0.88946		0.5312	0.6706	0.207874	20.1109	0.167719		0.625	0.7103	0.12009	19.2307	0.203471		0.5	0.7267	0.311958	21.1915	0.130822		0.59	0.76	0.223684	26.02	0.2058		0.47	0.63	0.253968	23.43	0.3214
dupssr12	1.08	0.75	0.7871	0.0471351	29.9692	0.012033		0.8125	0.7961	-0.0206004	15.3608	0.804422		0.875	0.8031	-0.0895281	23.5353	0.316112		0.8438	0.7827	-0.0780631	11.345	0.727774		0.6875	0.7614	0.0970581	19.7324	0.18244		0.5	0.74	0.324324	28.31	0.1315		0.84	0.81	-0.037037	29.67	0.0988
nc130	5	0.4375	0.3418	-0.279988	3.6923	0.054664		0.375	0.4107	0.0869248	0.247038	0.619168		0.625	0.4583	-0.363736	5.03221	0.02488		0.375	0.3472	-0.0800691	0.232964	0.629335		0.4375	0.4583	0.0453851	0.068262	0.793884		0.84	0.5	-0.68	16.07	0.0001		0.53	0.46	-0.152174	0.63	0.4283
phi015	8.08	0.7188	0.6675	-0.0768539	4.10517	0.662447		0.5938	0.5595	-0.0613047	2.67313	0.848611		0.7188	0.5868	-0.224949	20.0709	0.00269		0.4688	0.5412	0.133777	7.25744	0.297694		0.5	0.6037	0.171774	4.92464	0.553514		0.38	0.52	0.269231	10.73	0.097		0.56	0.53	-0.0566038	7.63	0.0542
phi033	9.01	0.875	0.7173	-0.219852	12.8841	0.044914		0.7188	0.5709	-0.259065	7.73182	0.258416		0.5938	0.6453	0.0798078	5.35288	0.499414		0.5	0.6141	0.1858	5.62764	0.466166		0.2812	0.369	0.23794	5.02567	0.540525		0.41	0.39	-0.0512821	3.39	0.7579		0.28	0.35	0.2	12.13	0.0592
phi034	7.02	0.4688	0.4761	0.0153329	0.031303	0.859565		0.4375	0.5	0.125	0.516054	0.47253		0.5	0.5	0	0	1		0.25	0.4107	0.391283	4.8042	0.02839		0.4688	0.5035	0.0689176	0.157083	0.691856		0.47	0.46	-0.0217391	0	0.9902		0.5	0.49	-0.0204082	0	1
phi036	3.02	0.625	0.6558	0.0469655	5.55929	0.850832		0.5312	0.5888	0.0978261	13.8783	0.178617		0.75	0.7753	0.0326325	9.0437	0.875221		0.6562	0.7808	0.15958	22.3028	0.100107		0.625	0.747	0.16332	16.5776	0.084248		0.72	0.66	-0.0909091	22.1	0.1051		0.75	0.69	-0.0869565	7.77	0.9328
phi050	10.03	0.2812	0.3892	0.277492	17.3864	0.007963		0.375	0.4688	0.200085	3.56601	0.312301		0.1875	0.437	0.570938	28.3525	8.1e-05		0.5312	0.5933	0.104669	12.4781	0.005912		0.0625	0.0615	-0.0162602	0.032264	0.85745		0.25	0.31	0.193548	3.01	0.3907		0	0.4	1	39.06	0
phi053	3.05	0.5	0.5903	0.152973	3.61995	0.305535		0.625	0.6622	0.0561764	2.85329	0.414802		0.4688	0.5928	0.209177	4.50613	0.211744		0.5312	0.6215	0.145294	5.844	0.119452		0.5625	0.6622	0.150559	7.15382	0.067153		0.66	0.65	-0.0153846	4.88	0.1879		0.5	0.65	0.230769	4.5	0.2126
phi056	1.01	0.4688	0.5098	0.0804237	1.45909	0.691743		0.6875	0.6344	-0.0837011	0.676445	0.87873		0.4375	0.4678	0.0647713	6.8816	0.075769		0.5625	0.6131	0.0825314	1.55314	0.67006		0.4688	0.5223	0.102432	1.69731	0.637532		0.47	0.52	0.0961538	9.36	0.0249		0.59	0.54	-0.0925926	0.55	0.9079
phi059	10.3	0.375	0.4688	0.200085	1.48166	0.223515		0.375	0.4107	0.0869248	0.247038	0.619168		0.5	0.4901	-0.0202	0.013587	0.907206		0.5312	0.4241	-0.252535	2.42697	0.119264		0.5	0.4762	-0.049979	0.08345	0.772675		0.25	0.4	0.375	4.8	0.0284		0.38	0.3	-0.266667	2.56	0.1094
phi064	1.11	0.6875	0.6938	0.00908043	6.42252	0.377558		0.5938	0.6339	0.0632592	2.26131	0.894166		0.6875	0.6652	-0.0335238	12.7393	0.047368		0.4062	0.6007	0.323789	18.3469	0.005421		0.8125	0.6637	-0.224198	6.32379	0.387913		0.66	0.66	0	7.31	0.2932		0.72	0.65	-0.107692	2.15	0.9058
phi076	4.11	0.5	0.4663	-0.0722711	3.43071	0.329861		0.25	0.4385	0.429875	18.1673	0.000406		0.0312	0.4658	0.933018	45.7121	0		0.1875	0.1751	-0.0708167	0.518277	0.914858		0.5	0.5	0	0	1		0	0.47	1	43.37	0		0.5	0.49	-0.0204082	0	1
phi082	7.05	0.6562	0.6421	-0.0219592	5.52429	0.478526		0.75	0.7168	-0.046317	4.85498	0.562543		0.7188	0.7247	0.0081413	8.5328	0.201608		0.6875	0.7049	0.0246844	15.5006	0.016701		0.5938	0.7098	0.163426	4.76939	0.573712		0.69	0.68	-0.0147059	2.23	0.8975		0.72	0.73	0.0136986	5.99	0.4247
phi083	2.04	0.25	0.2188	-0.142596	1.00377	0.3164		0.4062	0.3963	-0.0249811	0.021322	0.883904		0.3438	0.3963	0.132475	0.5664	0.451693		0.3438	0.2892	-0.188797	2.09183	0.148089		0.3438	0.3646	0.0570488	0.107379	0.743148		0.44	0.4	-0.1	0.15	0.7019		0.44	0.43	-0.0232558	0	0.9895
phi084	10.04	0.5625	0.498	-0.129518	0.414413	0.519738		0.2812	0.4836	0.418528	5.83882	0.015676		0.5625	0.506	-0.11166	0.414413	0.519738		0.5625	0.506	-0.11166	0.414413	0.519738		0.5312	0.4678	-0.135528	0.627415	0.428305		0.69	0.5	-0.38	4.39	0.0362		0.56	0.47	-0.191489	1.12	0.2893
phi098	2.02	0.4688	0.4175	-0.122874	0.385377	0.53474		0.6875	0.5	-0.375	4.85963	0.027492		0	0	NA	NA	NA		0	0.2679	1	28.7926	0		0.375	0.3095	-0.211632	2.56318	0.109379		0.38	0.3	-0.266667	2.56	0.1094		0.09	0.19	0.526316	6.12	0.0133
phi109188	5.03	0	0	NA	NA	NA		0.2812	0.3591	0.216931	2.51458	0.472663		0.3438	0.3695	0.0695535	0.890516	0.827716		0.2812	0.2495	-0.127054	1.31554	0.725447		0.1562	0.1463	-0.0676692	0.339442	0.560151		0.31	0.39	0.205128	4.53	0.6059		0.44	0.37	-0.189189	3.69	0.7182
phi115	8.03	0.5625	0.4043	-0.391294	6.84275	0.0089		0.5625	0.4365	-0.28866	3.17314	0.074858		0.3125	0.3095	-0.00969305	0.003219	0.954757		0.25	0.2679	0.066816	0.144066	0.704272		0.2188	0.1979	-0.105609	0.738907	0.390011		0.41	0.36	-0.138889	0.48	0.4872		0.13	0.12	-0.0833333	0.2	0.6546
phi116	7.06	0.6562	0.6895	0.0482959	12.217	0.0573		0.4375	0.4628	0.0546672	9.19224	0.163052		0.4062	0.3527	-0.151687	3.09518	0.796809		0.375	0.5506	0.318925	20.6949	0.002081		0.625	0.567	-0.102293	10.8867	0.091941		0.56	0.64	0.125	9.93	0.1278		0.59	0.59	0	6.46	0.3741
phi123	6.07	0.375	0.4043	0.0724709	0.247038	0.619168		0.375	0.4107	0.0869248	0.247038	0.619168		0.4062	0.4836	0.16005	0.842323	0.358733		0.1875	0.4365	0.570447	10.5905	0.001137		0.375	0.4583	0.181759	1.07817	0.299108		0.47	0.39	-0.205128	1.26	0.262		0.13	0.26	0.5	7.31	0.0069
phi126	6	0.5312	0.6006	0.115551	22.2738	0.013769		0.6562	0.6478	-0.012967	11.4419	0.324141		0.5625	0.6572	0.144096	17.724	0.059801		0.5312	0.5437	0.0229906	6.56074	0.76616		0.5938	0.5967	0.00486006	16.1258	0.096087		0.69	0.67	-0.0298507	4.61	0.9158		0.5	0.54	0.0740741	4.17	0.9393
phi128	5.07	0.5625	0.563	0.000888099	0.92731	0.818833		0.875	0.6567	-0.33242	17.2844	0.000618		0.5312	0.4747	-0.119023	3.17974	0.364734		0.5625	0.5635	0.00177462	0.22319	0.973762		0.4688	0.5352	0.124066	2.55629	0.465203		0.44	0.52	0.153846	3.52	0.318		0.44	0.53	0.169811	5.31	0.1503
phi213984	4.01	0.2188	0.1948	-0.123203	0.738907	0.390011		0.2188	0.2455	0.108758	0.366939	0.544677		0.125	0.1726	0.275782	1.8337	0.175691		0.125	0.119	-0.0504202	0.200168	0.654585		0.125	0.119	-0.0504202	0.200168	0.654585		0.44	0.4	-0.1	0.15	0.7019		0.41	0.32	-0.28125	3.1	0.0785
phi233376	8.09	0.7188	0.7261	0.0100537	7.79719	0.253341		0.4375	0.631	0.306656	16.4446	0.011556		0.6875	0.7287	0.056539	10.8929	0.091745		0.6875	0.6672	-0.0304257	6.21309	0.399748		0.7188	0.6989	-0.0284733	4.15343	0.655921		0.72	0.68	-0.0588235	5.22	0.5158		0.69	0.64	-0.078125	2.56	0.8614
phi236654	9.05	0.3438	0.4878	0.295203	3.11935	0.077368		0.4062	0.4241	0.042207	0.058641	0.808657		0.5938	0.5035	-0.179345	1.07377	0.300096		0.4062	0.4955	0.180222	1.07222	0.300444		0.3438	0.4678	0.265071	2.29768	0.129568		0.41	0.5	0.18	1.24	0.2664		0.53	0.49	-0.0816327	0.17	0.6778
phi308090	4.04	0.4375	0.5391	0.188462	2.34663	0.503646		0.6875	0.6349	-0.0828477	6.66615	0.083335		0.4375	0.4995	0.124124	3.04834	0.384232		0.5	0.6305	0.206979	7.84312	0.049368		0.25	0.2679	0.066816	0.144066	0.704272		0.22	0.2	-0.1	0.74	0.864		0.38	0.31	-0.225806	2.56	0.464
phi339017	1.03	0.7188	0.7173	-0.00209118	1.2927	0.972059		0.5312	0.6716	0.209053	9.79491	0.133559		0.5312	0.6637	0.199638	10.7052	0.097927		0.75	0.7063	-0.0618717	6.62494	0.356928		0.75	0.6453	-0.16225	4.00591	0.675876		0.66	0.66	0	1.64	0.6498		0.69	0.71	0.028169	2.79	0.8352
phi389203	6.03	0.5938	0.6558	0.094541	6.89651	0.330524		0.625	0.6964	0.102527	4.05188	0.669656		0.6562	0.6305	-0.0407613	2.99134	0.809933		0.625	0.565	-0.106195	5.13253	0.162346		0.5	0.5015	0.00299103	4.88872	0.558163		0.44	0.39	-0.128205	2.98	0.8108		0.59	0.52	-0.134615	3.86	0.6952
phi438301	4.05	0	0	NA	NA	NA		0.0312	0.0312	0	0	1		0.1562	0.1463	-0.0676692	0.339442	0.560151		0.0312	0.0908	0.656388	5.89199	0.01521		0.1562	0.2455	0.363747	3.43323	0.063897		0.19	0.34	0.441176	6.19	0.0129		0.06	0.06	0	0.03	0.8575
phi452693	6.04	0.3438	0.5229	0.342513	9.14243	0.027456		0.3125	0.625	0.5	14.7106	0.002081		0.625	0.5303	-0.178578	1.35454	0.716225		0.5625	0.5377	-0.0461224	2.81723	0.420671		0.625	0.5511	-0.134095	1.32858	0.722357		0.44	0.63	0.301587	7.9	0.048		0.44	0.52	0.153846	3.04	0.3849
phi96100	2	0.6562	0.627	-0.046571	11.9061	0.064096		0.5	0.5699	0.122653	9.14235	0.16573		0.75	0.6771	-0.107665	3.19964	0.783405		0.5	0.5977	0.16346	2.93453	0.401831		0.7188	0.7331	0.0195062	7.65266	0.264671		0.69	0.71	0.028169	4.93	0.5522		0.59	0.66	0.106061	3.55	0.3147
phi96342	10.02	0.2188	0.4878	0.551456	10.7476	0.001044		0.3125	0.3472	0.0999424	0.321314	0.570819		0.5312	0.4479	-0.185979	1.21937	0.269485		0.3125	0.4107	0.239104	1.81465	0.177951		0.375	0.5	0.25	2.07426	0.149803		0.66	0.5	-0.32	2.9	0.0888		0.69	0.47	-0.468085	7.46	0.0063
umc1033	9.02	0.7188	0.8008	0.102398	25.5258	0.225112		0.8125	0.8358	0.0278775	22.3435	0.379953		0.6875	0.813	0.154367	30.1456	0.089101		0.625	0.7535	0.170537	25.5123	0.043473		0.8438	0.8239	-0.0241534	23.3518	0.325514		0.81	0.83	0.0240964	25.73	0.2169		0.78	0.75	-0.04	17.18	0.7002
umc1359	8	0.5	0.5952	0.159946	18.9145	0.041362		0.6875	0.7108	0.03278	11.8432	0.065559		0.6875	0.689	0.00217707	7.58972	0.269728		0.7188	0.7366	0.0241651	8.5063	0.579508		0.625	0.6116	-0.0219097	6.15952	0.40556		0.59	0.6	0.0166667	10.94	0.3618		0.41	0.46	0.108696	4.26	0.2351
bnlg572	7.03	0.375	0.5347	0.298672	12.0328	0.007272		0.0938	0.6701	0.860021	50.5403	0		0.5	0.6503	0.231124	6.95963	0.073196		0.0625	0.6667	0.906255	58.2015	0		0.25	0.6091	0.589558	23.67	2.9e-05		0.06	0.63	0.904762	56.04	0		0.13	0.56	0.767857	35.01	0
Mean		0.490142	0.517008	0.0463943				0.49095	0.540218	0.089829				0.495887	0.525326	0.0586916				0.458053	0.521674	0.131654				0.476984	0.509105	0.0557391				0.486579	0.526842	0.0652418				0.470789	0.492368	0.0490515
Standard deviation		0.199647	0.189034	0.181247				0.201864	0.157877	0.235789				0.204754	0.178968	0.228935				0.210613	0.184918	0.273735				0.196806	0.188277	0.171834				0.19661	0.148435	0.304815				0.209715	0.170776	0.281576
NA ̶ not available
